# Supplementary material for: Effects of indium doping on methanol deep oxidation over Ag/CeO2 catalysts
Source: Royal Society of Chemistry journal article supplement (doi:10.1039/d3nj00930k), 2023-01-01
Supplement: d3nj00930k1.pdf [file d3nj00930k1.pdf]

1  
2  
3  
4  
5  
6  
7  
8  
9  
10  
11  
12  
13  
14

## Supplementary Information

### Effects of indium doping on methanol deep oxidation over Ag/CeO<sub>2</sub>

#### Catalyst

Yongli Xiao <sup>a</sup>, Yongdong Chen <sup>\*a</sup>, Jie Deng <sup>a</sup>, Li Luo <sup>a</sup>, Yue Li <sup>a</sup> and Xinyu Bai <sup>a</sup>

<sup>a</sup>College of Chemistry and Chemical Engineering, Southwest Petroleum University, Chengdu, Sichuan 610500, PR of China.

\*Address correspondence to this author.

Email: yongdongchen@swpu.edu.cn, Phone, and Fax: +86 02883032863

Table S1 kinetic parameters of methanol oxidation

| Catalyst                                                | T/K | 1/T (1/K) | 1/T*10 <sup>-3</sup><br>(1*10 <sup>-3</sup> K <sup>-1</sup> ) | k/cm <sup>3</sup> ·g <sup>-1</sup> ·s <sup>-1</sup> | ln(k)/cm <sup>3</sup> ·g <sup>-1</sup> ·s <sup>-1</sup> | Ea/(KJ/mol) |
|---------------------------------------------------------|-----|-----------|---------------------------------------------------------------|-----------------------------------------------------|---------------------------------------------------------|-------------|
| Ag/CeO <sub>2</sub>                                     | 359 | 0.002786  | 2.785515                                                      | 2.788881                                            | 1.025641                                                | 66.2        |
|                                                         | 364 | 0.002747  | 2.747253                                                      | 3.503534                                            | 1.253772                                                |             |
|                                                         | 369 | 0.002710  | 2.710027                                                      | 4.954755                                            | 1.600348                                                |             |
|                                                         | 374 | 0.002674  | 2.673797                                                      | 6.686150                                            | 1.900038                                                |             |
| Ag/Ce <sub>0.95</sub> In <sub>0.05</sub> O <sub>δ</sub> | 359 | 0.002786  | 2.785515                                                      | 2.907492                                            | 1.067291                                                | 65.2        |
|                                                         | 364 | 0.002747  | 2.747253                                                      | 3.983991                                            | 1.382284                                                |             |
|                                                         | 369 | 0.002710  | 2.710027                                                      | 5.445153                                            | 1.694726                                                |             |
|                                                         | 374 | 0.002674  | 2.673797                                                      | 6.936970                                            | 1.936865                                                |             |
| Ag/Ce <sub>0.90</sub> In <sub>0.10</sub> O <sub>δ</sub> | 359 | 0.002786  | 2.785515                                                      | 5.199531                                            | 1.648568                                                | 60.7        |
|                                                         | 364 | 0.002747  | 2.747253                                                      | 7.694782                                            | 2.040542                                                |             |
|                                                         | 369 | 0.002710  | 2.710027                                                      | 9.756009                                            | 2.277883                                                |             |
|                                                         | 374 | 0.002674  | 2.673797                                                      | 11.878775                                           | 2.474753                                                |             |
| Ag/Ce <sub>0.85</sub> In <sub>0.15</sub> O <sub>δ</sub> | 359 | 0.002786  | 2.785515                                                      | 4.225443                                            | 1.441124                                                | 64.7        |
|                                                         | 364 | 0.002747  | 2.747253                                                      | 6.436212                                            | 1.861940                                                |             |
|                                                         | 369 | 0.002710  | 2.710027                                                      | 8.717927                                            | 2.165382                                                |             |
|                                                         | 374 | 0.002674  | 2.673797                                                      | 10.017915                                           | 2.304375                                                |             |
| Ag/Ce <sub>0.80</sub> In <sub>0.20</sub> O <sub>δ</sub> | 359 | 0.002786  | 2.785515                                                      | 2.552251                                            | 0.936976                                                | 67.4        |
|                                                         | 364 | 0.002747  | 2.747253                                                      | 3.264518                                            | 1.183112                                                |             |
|                                                         | 369 | 0.002710  | 2.710027                                                      | 4.710819                                            | 1.549862                                                |             |
|                                                         | 374 | 0.002674  | 2.673797                                                      | 6.187149                                            | 1.822474                                                |             |

Table S2 The results of three activity tests

| Ag/CeO <sub>2</sub> |                                        | Ag/Ce <sub>0.95</sub> In <sub>0.05</sub> O <sub>δ</sub> |                                        | Ag/Ce <sub>0.90</sub> In <sub>0.10</sub> O <sub>δ</sub> |                                        | Ag/Ce <sub>0.85</sub> In <sub>0.15</sub> O <sub>δ</sub> |                                        | Ag/Ce <sub>0.80</sub> In <sub>0.20</sub> O <sub>δ</sub> |                                        |
|---------------------|----------------------------------------|---------------------------------------------------------|----------------------------------------|---------------------------------------------------------|----------------------------------------|---------------------------------------------------------|----------------------------------------|---------------------------------------------------------|----------------------------------------|
| T/<br>°C            | CH <sub>3</sub> OH<br>Conversion<br>/% | T/<br>°C                                                | CH <sub>3</sub> OH<br>Conversion<br>/% | T/<br>°C                                                | CH <sub>3</sub> OH<br>Conversion<br>/% | T/<br>°C                                                | CH <sub>3</sub> OH<br>Conversion<br>/% | T/<br>°C                                                | CH <sub>3</sub> OH<br>Conversion<br>/% |
| 87                  | 2.6                                    | 90                                                      | 3.7                                    | 89                                                      | 8.9                                    | 88                                                      | 7.9                                    | 87                                                      | 1.1                                    |
|                     | 3.6                                    |                                                         | 3.7                                    |                                                         | 8.9                                    |                                                         | 7.8                                    |                                                         | 1.3                                    |
|                     | 3.1                                    |                                                         | 3.7                                    |                                                         | 8.8                                    |                                                         | 7.9                                    |                                                         | 1.1                                    |
| 107                 | 7.7                                    | 110                                                     | 12                                     | 110                                                     | 29.2                                   | 110                                                     | 20.5                                   | 110                                                     | 6.8                                    |
|                     | 8.8                                    |                                                         | 11.8                                   |                                                         | 29.3                                   |                                                         | 20.4                                   |                                                         | 6.6                                    |
|                     | 8.7                                    |                                                         | 12.2                                   |                                                         | 29.2                                   |                                                         | 20.5                                   |                                                         | 6.8                                    |
| 128                 | 31.5                                   | 130                                                     | 34.5                                   | 130                                                     | 53.3                                   | 130                                                     | 46                                     | 130                                                     | 29.7                                   |
|                     | 30.5                                   |                                                         | 34.4                                   |                                                         | 53.1                                   |                                                         | 45.9                                   |                                                         | 29.8                                   |
|                     | 32.5                                   |                                                         | 34.5                                   |                                                         | 53.4                                   |                                                         | 45.9                                   |                                                         | 29.6                                   |
| 149                 | 51.4                                   | 150                                                     | 57.4                                   | 150                                                     | 82.4                                   | 150                                                     | 68.2                                   | 150                                                     | 46.4                                   |
|                     | 51.9                                   |                                                         | 57.6                                   |                                                         | 82.5                                   |                                                         | 68.1                                   |                                                         | 46.3                                   |
|                     | 51                                     |                                                         | 57.5                                   |                                                         | 82.4                                   |                                                         | 68.1                                   |                                                         | 46.4                                   |
| 160                 | 66.5                                   | 160                                                     | 71.4                                   | 160                                                     | 92.7                                   | 160                                                     | 77.4                                   | 160                                                     | 52.9                                   |
|                     | 66.4                                   |                                                         | 71.2                                   |                                                         | 92.6                                   |                                                         | 77.3                                   |                                                         | 52.8                                   |
|                     | 66.5                                   |                                                         | 71.6                                   |                                                         | 92.7                                   |                                                         | 77.4                                   |                                                         | 52.9                                   |
| 170                 | 78.7                                   | 170                                                     | 80.9                                   | 170                                                     | 97.1                                   | 170                                                     | 82.4                                   | 170                                                     | 69                                     |
|                     | 78.9                                   |                                                         | 80.8                                   |                                                         | 97.2                                   |                                                         | 82.5                                   |                                                         | 68.9                                   |
|                     | 78.8                                   |                                                         | 80.9                                   |                                                         | 97.1                                   |                                                         | 82.4                                   |                                                         | 69                                     |
| 190                 | 86                                     | 190                                                     | 89.5                                   | 190                                                     | 98.2                                   | 190                                                     | 91.2                                   | 190                                                     | 78.9                                   |
|                     | 85.9                                   |                                                         | 89.2                                   |                                                         | 98.1                                   |                                                         | 91.3                                   |                                                         | 78.8                                   |
|                     | 86                                     |                                                         | 89.5                                   |                                                         | 98.2                                   |                                                         | 91.1                                   |                                                         | 78.9                                   |
| 210                 | 92.8                                   | 210                                                     | 94.5                                   | 210                                                     | 99.1                                   | 210                                                     | 97.4                                   | 210                                                     | 91                                     |
|                     | 92.7                                   |                                                         | 94.4                                   |                                                         | 99.1                                   |                                                         | 97.4                                   |                                                         | 90.9                                   |
|                     | 92.8                                   |                                                         | 94.5                                   |                                                         | 99.1                                   |                                                         | 97.3                                   |                                                         | 91.1                                   |
| 230                 | 96.8                                   | 230                                                     | 96.4                                   | 230                                                     | 99.2                                   | 230                                                     | 98.6                                   | 230                                                     | 94.7                                   |
|                     | 96.7                                   |                                                         | 96.4                                   |                                                         | 99.1                                   |                                                         | 98.5                                   |                                                         | 94.6                                   |
|                     | 96.9                                   |                                                         | 96.3                                   |                                                         | 99.2                                   |                                                         | 98.6                                   |                                                         | 94.7                                   |
| 250                 | 97.7                                   | 250                                                     | 97.7                                   | 250                                                     | 99.4                                   | 250                                                     | 99                                     | 250                                                     | 97.2                                   |
|                     | 97.7                                   |                                                         | 97.8                                   |                                                         | 99.4                                   |                                                         | 98.9                                   |                                                         | 97.1                                   |
|                     | 97.6                                   |                                                         | 97.7                                   |                                                         | 99.3                                   |                                                         | 99                                     |                                                         | 97.2                                   |

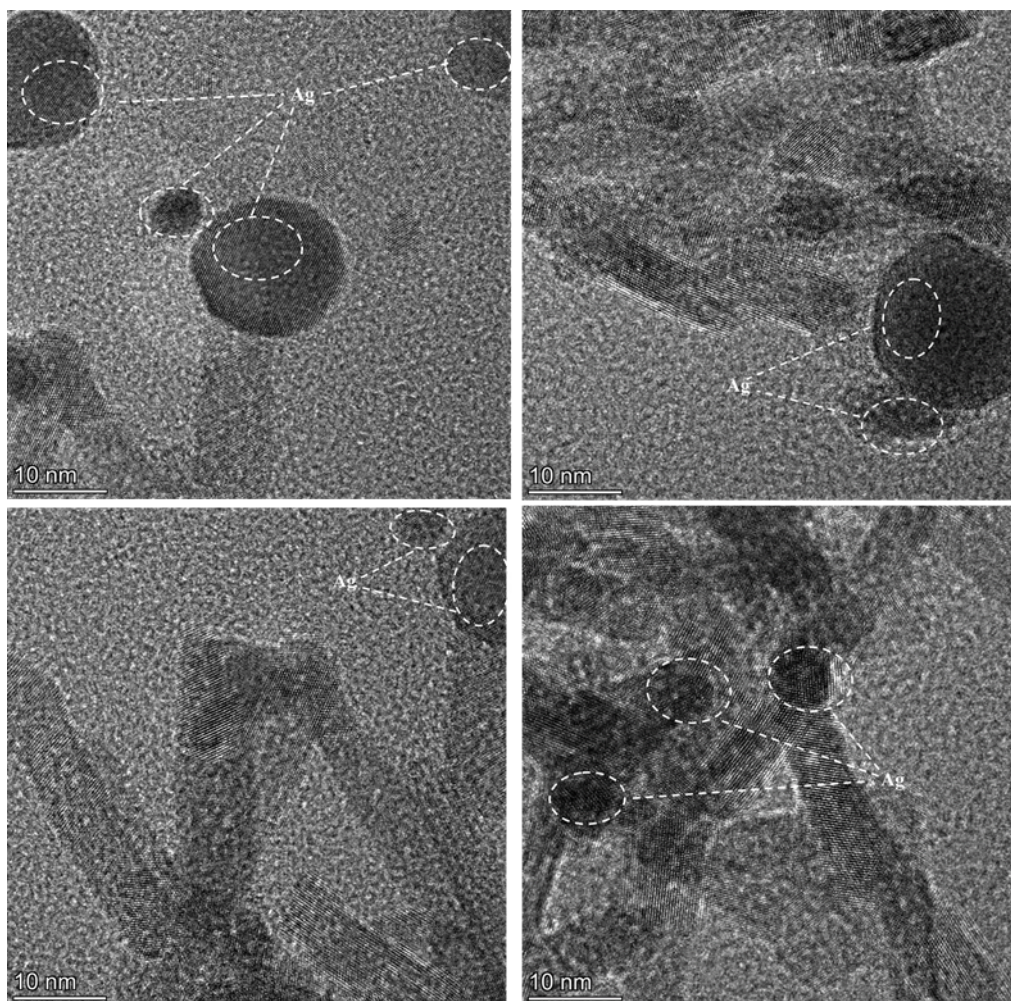

Fig. S1 HR-TEM image of Ag/Ce<sub>0.90</sub>In<sub>0.10</sub>O<sub>δ</sub>.

17  
18

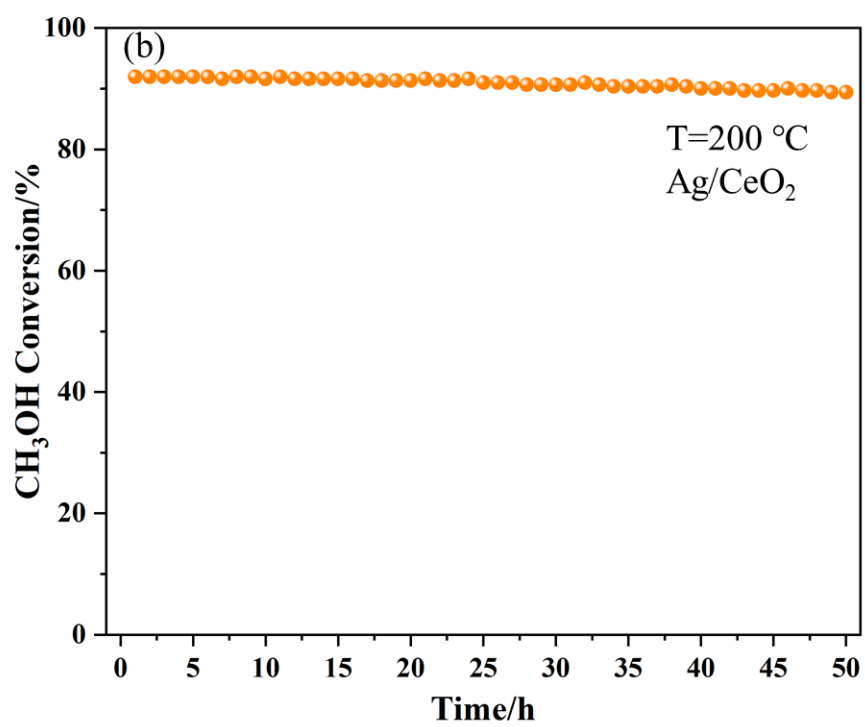

Fig. S2 Catalytic durability of Ag/CeO<sub>2</sub> for CH<sub>3</sub>OH oxidation at 200 °C.

19  
20

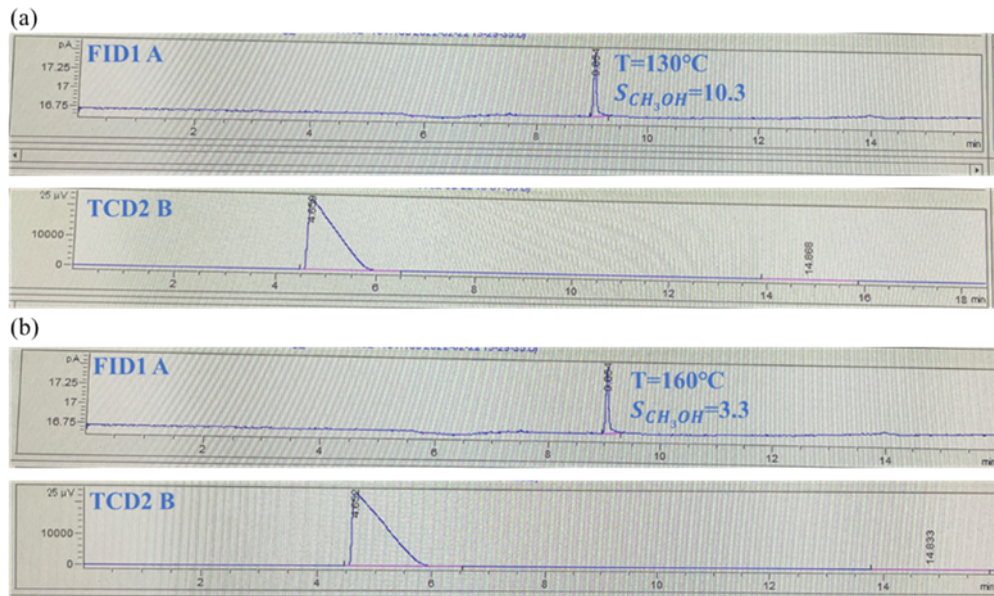

Fig. S3 The original chromatograms of product analysis at  $T_{50}$  and  $T_{90}$ .

21  
22  
23

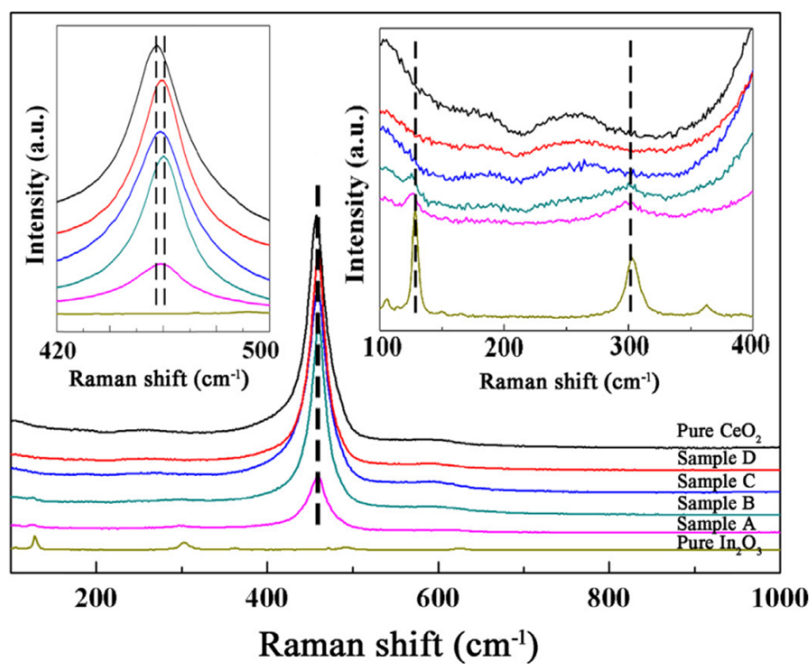

24  
25  
26  
27

Fig.S4 Raman spectra of all samples(In sample A-D, the weight ratio of  $In_2O_3$ :  $CeO_2$  is 3:1, 1:1, 1:3 and 1:9 respectively.)<sup>1</sup>

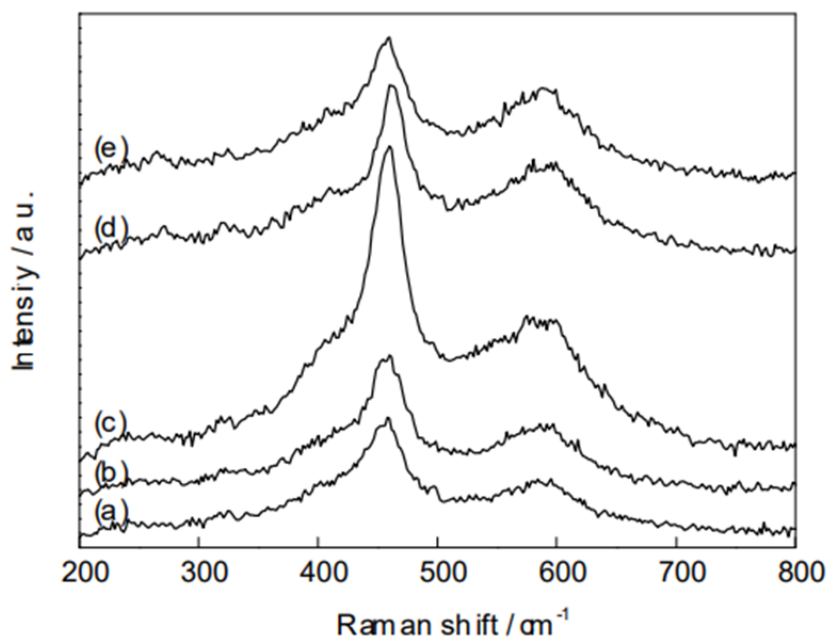

28  
 29 Fig.S5 Raman spectra of the samples synthesized solvothermal with In/(In+Ce) of 0 (a), 1% (b), 3%  
 30 (c), 5% (d) and 10% (e) at 200 °C for 24 h followed by calcination at 500 °C for 2 h in air.<sup>2</sup>  
 31

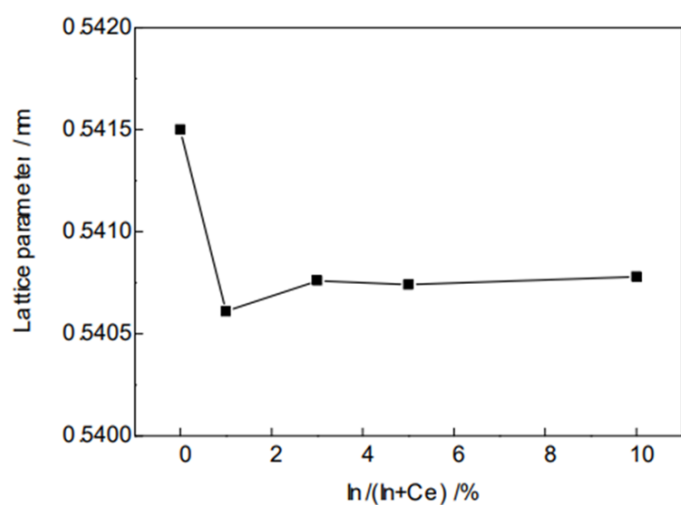

32  
 33 Fig.S6 Lattice parameters of the samples synthesized solvothermal with different In/(In+Ce) <sup>2</sup>  
 34  
 35

### 36 Reference

- 37 1. Wang, W.; Zhang, Y.; Wang, Z. Y.; Yan, J. M.; Ge, Q. F.; Liu, C. J., Reverse water gas shift  
 38 over In<sub>2</sub>O<sub>3</sub>-CeO<sub>2</sub> catalysts. *Catal Today* **2016**, *259*, 402-408.  
 39 2. Zhang, S.; Xu, Y.; Wang, T.; Li, R.; Cai, H., SOLID SOLUBILITY AND OXYGEN STORAGE  
 40 CAPABILITY OF In<sup>3+</sup>-DOPED CeO<sub>2</sub>. *Acta Metall Sin* **2016**, *52* (5), 607-613.
